# Supplementary material for: Identification of a Peptide-Pheromone that Enhances Listeria monocytogenes Escape from Host Cell Vacuoles
Source: PubMed Central journal article supplement (PMC4379056; doi:10.1371/journal.ppat.1004707), 2015-03-30
Supplement: ppat.1004707.s001.pdf [file ppat.1004707.s001.pdf]

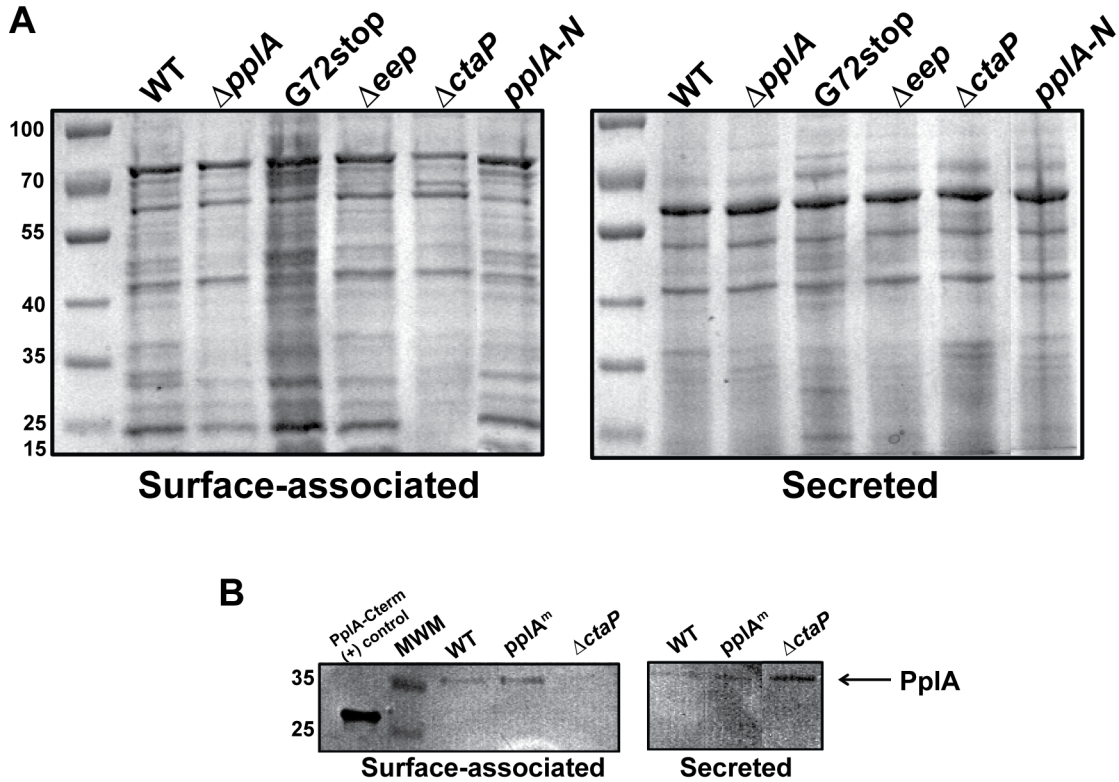

**Supplemental Figure S1. Coomassie stain and Western analysis of *L. monocytogenes* secreted and cell surface-associated proteins following SDS-PAGE.**

**(A)** *L. monocytogenes* strains were grown to stationary phase in BHI at 37°C with shaking overnight. Samples were normalized to an optical density at 600nm of 1.5. Bacteria were recovered and non-covalently associated surface proteins were extracted from the bacterial pellets by boiling in SDS-boiling buffer. Secreted proteins present in the culture supernatants were TCA-precipitated and the isolated protein pellets were resuspended in SDS-boiling buffer. Protein samples were separated using SDS-PAGE and proteins were visualized by coomassie staining. **(B)** Western blot analysis of the PplA lipoprotein of samples isolated as described in panel A from wild-type *L. monocytogenes*, the *pplA<sup>m</sup>* mutant, which contains three amino acid substitutions within the predicted pPplA peptide region within the chromosome, and the  $\Delta$ *ctaP* oligopeptide transport mutant. The His-purified truncated C-terminal region of the PplA lipoprotein was included as the positive control. The arrow indicates the full length PplA lipoprotein.
