# Supplementary material for: Identification of a Peptide-Pheromone that Enhances Listeria monocytogenes Escape from Host Cell Vacuoles
Source: PubMed Central journal article supplement (PMC4379056; doi:10.1371/journal.ppat.1004707), 2015-03-30
Supplement: ppat.1004707.s002.pdf [file ppat.1004707.s002.pdf]

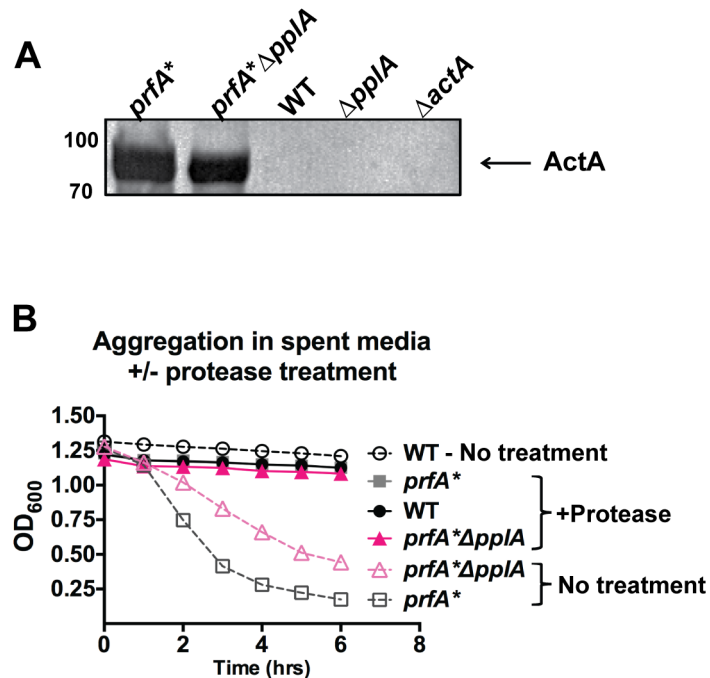

**Supplemental Figure S2. Reduced bacterial aggregation in a *prfA\*ΔpplA* is not due to decreased levels of ActA protein, and treatment of spent media with protease K eliminates bacterial aggregation.** (A) Measurement of bacterial surface-associated ActA protein levels. Overnight cultures of the indicated strains were grown overnight to stationary phase in BHI at 37°C with shaking, cells were normalized to an optical density at 600nm of 1.5, and non-covalently associated cell surface proteins were extracted by boiling recovered bacteria in SDS-boiling buffer. The presence of ActA was detected using western blot analysis with antibodies directed against ActA. (B) Assessment of bacterial aggregation for bacteria incubated in spent media derived from *pplA-G72<sub>STOP</sub>* codon mutant cultures with and without proteinase K treatment. Prior to measurement of bacterial aggregation, a portion of spent media derived from *pplA-G72<sub>STOP</sub>* cultures was treated with 50 μg/mL of proteinase K for 30 minutes at 37°C, then protease was heat-inactivated at 65°C. *L. monocytogenes* strains to be assayed for bacterial aggregation were recovered and resuspended in spent media treated or untreated with proteinase K, and the optical-density 600nm was measured over time. For both panels (A) and (B), data is representative of at least two-independent experiments.
