# Supplementary material for: Identification of a Peptide-Pheromone that Enhances Listeria monocytogenes Escape from Host Cell Vacuoles
Source: PubMed Central journal article supplement (PMC4379056; doi:10.1371/journal.ppat.1004707), 2015-03-30
Supplement: ppat.1004707.s003.pdf [file ppat.1004707.s003.pdf]

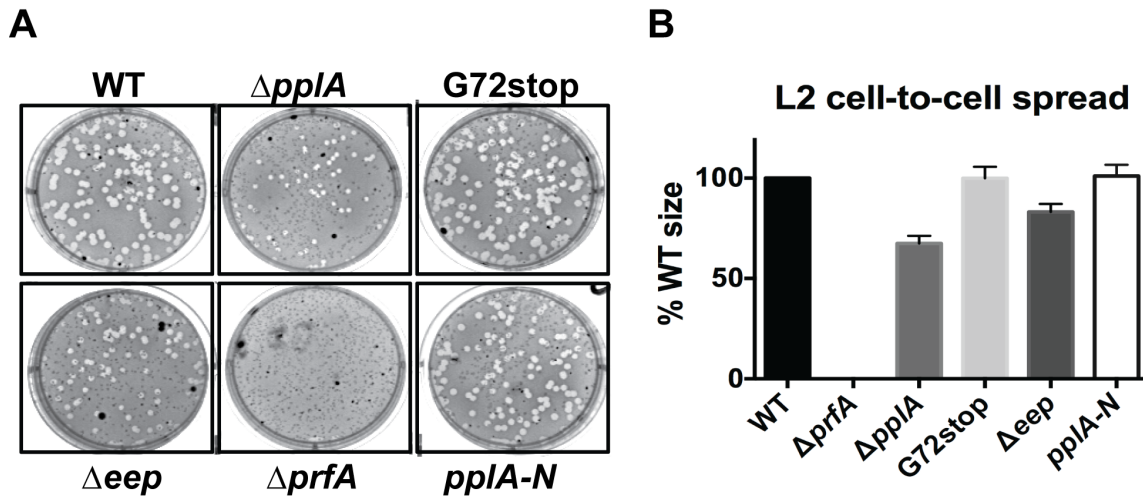

**Supplemental Figure S3. Loss of pPplA impairs the ability of *L. monocytogenes* to form plaques in cell monolayers.** (A) The ability of the various *L. monocytogenes* strains to invade, multiply, and spread from cell-to-cell was determined by assessing plaque formation within monolayers of fibroblast tissue culture cells. Cells were infected with an MOI of 10:1 and at 1 hour post-infection were washed, gentamicin was added, and plaques were visualized three days post-infection by staining with Neutral Red. Zones of clearing that did not stain indicate plaque formation. (B) Quantification of the diameter of plaques formed compared to wild-type (set to 100%). At least 20 plaques from three independent experiments were counted and measured for each strain. Data shown for panels A and B are representative of three independent experiments done in duplicate. Loss of *pplA* but not the lipoprotein (*pplA*-G72<sub>STOP</sub> mutant) impaired the ability of *L. monocytogenes* to reach the host cytosol and spread efficiently from cell-to-cell.
