# Supplementary material for: Identification of a Peptide-Pheromone that Enhances Listeria monocytogenes Escape from Host Cell Vacuoles
Source: PubMed Central journal article supplement (PMC4379056; doi:10.1371/journal.ppat.1004707), 2015-03-30
Supplement: ppat.1004707.s004.pdf [file ppat.1004707.s004.pdf]

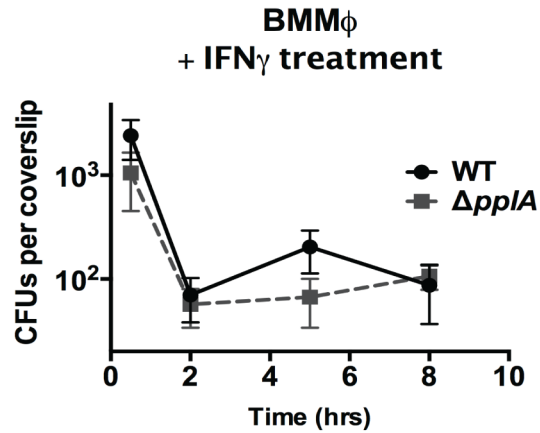

**Supplemental Figure S4.  $\Delta ppIA$  mutant and wild-type *L. monocytogenes* infection of IFN $\gamma$ -treated bone marrow-derived macrophages (BMM $\phi$ ).** Measurement of intracellular growth of wild type and  $\Delta ppIA$  in BMM $\phi$  using an MOI of 1:1. Macrophages were treated with 1 ng/mL IFN $\gamma$  twenty-four hours prior to bacterial infection. Data shown is representative of three-independent experiments.
