# Supplementary material for: Identification of a Peptide-Pheromone that Enhances Listeria monocytogenes Escape from Host Cell Vacuoles
Source: PubMed Central journal article supplement (PMC4379056; doi:10.1371/journal.ppat.1004707), 2015-03-30
Supplement: ppat.1004707.s007.pdf [file ppat.1004707.s007.pdf]

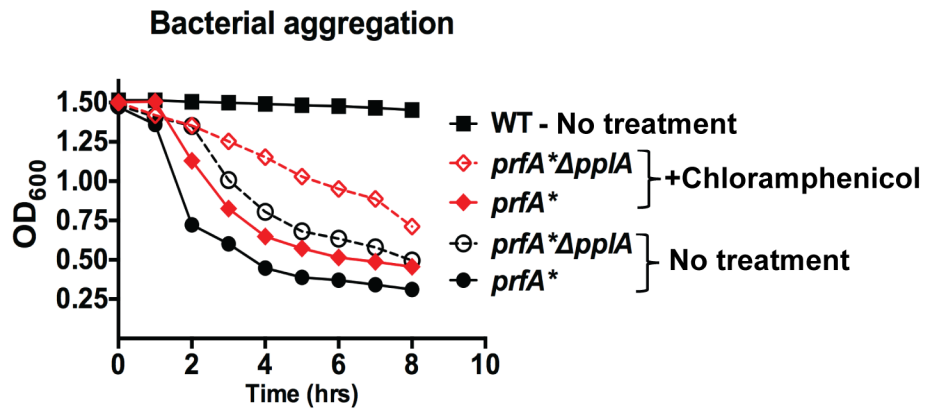

**Supplemental Figure S7. Bacterial aggregation is reduced when protein synthesis is inhibited.** Assessment of bacterial aggregation in the presence of the antibiotic chloramphenicol, an inhibitor of protein translation. The optical-density at 600nm was monitored at the indicated time points for wild type, *prfA\**, or *prfA\**  $\Delta$ *pplA* strains of log-phase bacteria resuspended in 1 mL of spent media derived from *prfA\** strains, with or without the addition of 10  $\mu$ g/mL of chloramphenicol during static incubation. Data shown is representative of at least two-independent experiments.
